# Supplementary material for: Estimated incubation period distributions of mpox using cases from two international European festivals and outbreaks in a club in Berlin, May to June 2022
Source: PubMed Central journal article supplement (PMC10370040; doi:10.2807/1560-7917.es.2023.28.27.2200806), 2023-07-06
Supplement: 22-00806_BARTEL_Supplement.pdf [file 22-00806_BARTEL_Supplement.pdf]

## Eurosurveillance

### Supplement for “Estimated incubation period distributions of monkeypox using cases from two international European festivals and outbreaks in a club in Berlin, May – June 2022”

"This supplementary material is hosted by *Eurosurveillance* as supporting information alongside the article "Estimated incubation period distributions of monkeypox using cases from two international European festivals and outbreaks in a club in Berlin, May – June 2022", on behalf of the authors, who remain responsible for the accuracy and appropriateness of the content. The same standards for ethics, copyright, attributions and permissions as for the article apply. Supplements are not edited by *Eurosurveillance* and the journal is not responsible for the maintenance of any links or email addresses provided therein."

#### Table S1: Parameters of the incubation period distributions (posterior median + 95% credible interval)

##### Weibull:

- Intercept: 2.28 (2.17– 2.38)
- Shape: 1.81 (1.57 – 2.08)
- Scale: 10.98 (9.84 – 12.11)

##### Lognormal:

- Intercept: 2.10 (1.98– 2.21)
- SD: 0.63 (0.55 – 0.72)

##### Gamma:

- Intercept: 0.10 (0.09 – 0.11)
- Shape: 2.87 (2.19 – 3.64)
- Rate: 0.30 (0.22 – 0.38)
- Scale: 3.37 (2.53 – 4.38)

#### Goodness of fit

**Table S2.** Computed goodness of fit of the models based on three parametric distributions using the widely applicable information criterion (WAIC), the leave-one-out information criterion (LOOIC) and the 10-fold cross-validation information criterion (10-fold IC).

| Distribution     | WAIC*  | LOOIC* | 10-fold IC* |
|------------------|--------|--------|-------------|
| <b>Lognormal</b> | -297.2 | -297.2 | -296.9      |
| <b>Weibull</b>   | -295.7 | -295.7 | -295.4      |
| <b>Gamma</b>     | -294.4 | -294.4 | -296.1      |

\*Goodness of fit estimates, higher values indicate a better fit.

## Sensitivity Analysis

1. Table S3: All cases excluding one outlier case with an incubation period of 30 to 35 days.  
n = 121

| Quantile     | Lognormal          | Weibull            | Gamma              |
|--------------|--------------------|--------------------|--------------------|
| <b>2,5%</b>  | 2.4 (1.9 - 2.9)    | 1.6 (1.1 - 2.1)    | 2 (1.4 - 2.5)      |
| <b>5%</b>    | 2.9 (2.4 - 3.4)    | 2.3 (1.7 - 2.9)    | 2.6 (2 - 3.2)      |
| <b>10%</b>   | 3.6 (3 - 4.2)      | 3.3 (2.6 - 4)      | 3.5 (2.8 - 4.2)    |
| <b>25%</b>   | 5.3 (4.6 - 6)      | 5.6 (4.7 - 6.5)    | 5.5 (4.7 - 6.3)    |
| <b>50%</b>   | 8 (7.2 - 9)        | 8.9 (7.9 - 9.9)    | 8.5 (7.6 - 9.5)    |
| <b>75%</b>   | 12.2 (10.8 - 13.8) | 12.8 (11.6 - 14)   | 12.4 (11.1 - 13.8) |
| <b>90%</b>   | 17.8 (15.3 - 20.8) | 16.7 (15.1 - 18.5) | 16.9 (15 - 19)     |
| <b>95%</b>   | 22.4 (18.7 - 26.7) | 19.2 (17.2 - 21.4) | 19.9 (17.6 - 22.7) |
| <b>97,5%</b> | 27.2 (22.2 - 33)   | 21.4 (19.1 - 24.1) | 22.9 (20.1 - 26.3) |
| <b>99%</b>   | 34.2 (27.2 - 42.6) | 24.1 (21.2 - 27.4) | 26.6 (23.1 - 30.8) |

2. Table S4: All cases that attended the fetish festival (Antwerp, Belgium), gay pride festival (Gran Canaria, Spain) and Club C (Berlin, Germany; 14/15 May 2022).

n = 71

| Quantile     | Lognormal          | Weibull            | Gamma              |
|--------------|--------------------|--------------------|--------------------|
| <b>2,5%</b>  | 3 (2.1 - 3.8)      | 2 (1.2 - 2.8)      | 2.5 (1.5 - 3.4)    |
| <b>5%</b>    | 3.6 (2.7 - 4.5)    | 2.9 (1.9 - 3.9)    | 3.2 (2.2 - 4.2)    |
| <b>10%</b>   | 4.5 (3.6 - 5.5)    | 4.2 (3 - 5.4)      | 4.3 (3.2 - 5.5)    |
| <b>25%</b>   | 6.5 (5.4 - 7.6)    | 6.9 (5.5 - 8.3)    | 6.7 (5.5 - 8)      |
| <b>50%</b>   | 9.8 (8.4 - 11.3)   | 10.8 (9.4 - 12.4)  | 10.3 (8.9 - 11.8)  |
| <b>75%</b>   | 14.8 (12.6 - 17.4) | 15.4 (13.6 - 17.4) | 15 (13.1 - 17.2)   |
| <b>90%</b>   | 21.5 (17.6 - 26.2) | 20 (17.6 - 22.8)   | 20.2 (17.4 - 23.6) |
| <b>95%</b>   | 26.8 (21.4 - 33.7) | 22.8 (19.8 - 26.2) | 23.9 (20.3 - 28.1) |
| <b>97,5%</b> | 32.5 (25.3 - 42.2) | 25.4 (21.8 - 29.5) | 27.3 (23 - 32.6)   |
| <b>99%</b>   | 40.6 (30.3 - 54.4) | 28.4 (24.3 - 33.6) | 31.8 (26.3 - 38.4) |

3. Table S5: All cases that attended the fetish festival (Antwerp, Belgium), gay pride festival (Gran Canaria, Spain) and Club C (Berlin, Germany; 14/15 May 2022) independent of the length of exposure.

n = 120

| Quantile     | Lognormal          | Weibull            | Gamma              |
|--------------|--------------------|--------------------|--------------------|
| <b>2,5%</b>  | 2.2 (1.7 - 2.8)    | 1.5 (1 - 2.1)      | 1.8 (1.2 - 2.5)    |
| <b>5%</b>    | 2.8 (2.2 - 3.4)    | 2.2 (1.5 - 2.9)    | 2.5 (1.7 - 3.2)    |
| <b>10%</b>   | 3.5 (2.8 - 4.3)    | 3.3 (2.5 - 4.2)    | 3.5 (2.6 - 4.3)    |
| <b>25%</b>   | 5.4 (4.5 - 6.2)    | 5.9 (4.8 - 6.9)    | 5.7 (4.7 - 6.7)    |
| <b>50%</b>   | 8.6 (7.5 - 9.8)    | 9.7 (8.4 - 10.9)   | 9.2 (8.1 - 10.4)   |
| <b>75%</b>   | 13.7 (11.9 - 15.8) | 14.4 (12.9 - 15.9) | 13.9 (12.4 - 15.6) |
| <b>90%</b>   | 20.8 (17.5 - 24.8) | 19.1 (17.2 - 21.5) | 19.4 (17 - 21.9)   |
| <b>95%</b>   | 26.8 (21.9 - 32.8) | 22.2 (19.8 - 25.1) | 23.2 (20.2 - 26.5) |
| <b>97,5%</b> | 33.3 (26.7 - 41.9) | 25 (21.9 - 28.5)   | 26.9 (23.1 - 31)   |
| <b>99%</b>   | 42.9 (33.1 - 55.4) | 28.4 (24.6 - 32.8) | 31.5 (26.9 - 36.7) |

4. Effect of the length of exposure (in days) on the incubation period estimation.

**Table S6: Lognormal**

| Quantile/length in days | 4 (n=104)          | 5 (n=122)          | 6 (n=130)          | 8 (n=146)          | 10 (n=160)         |
|-------------------------|--------------------|--------------------|--------------------|--------------------|--------------------|
| 2,5%                    | 2.3 (1.8 - 2.8)    | 2.4 (1.9 - 2.8)    | 2.4 (1.9 - 2.9)    | 2.1 (1.7 - 2.5)    | 2.1 (1.7 - 2.5)    |
| 5%                      | 2.8 (2.2 - 3.3)    | 2.9 (2.3 - 3.4)    | 2.9 (2.4 - 3.4)    | 2.6 (2.1 - 3.1)    | 2.6 (2.2 - 3.1)    |
| 10%                     | 3.5 (2.9 - 4.1)    | 3.6 (3.0 - 4.2)    | 3.6 (3.1 - 4.2)    | 3.3 (2.8 - 3.8)    | 3.3 (2.8 - 3.9)    |
| 25%                     | 5.1 (4.3 - 5.8)    | 5.3 (4.6 - 6.0)    | 5.3 (4.7 - 6)      | 5 (4.4 - 5.6)      | 5 (4.4 - 5.7)      |
| 50%                     | 7.7 (6.8 - 8.7)    | 8.1 (7.2 - 9.1)    | 8.1 (7.2 - 9)      | 7.9 (7 - 8.8)      | 7.9 (7.1 - 8.8)    |
| 75%                     | 11.7 (10.2 - 13.4) | 12.5 (11.0 - 14.1) | 12.3 (10.9 - 13.9) | 12.4 (11 - 14.1)   | 12.4 (11 - 14)     |
| 90%                     | 17.1 (14.5 - 20.3) | 18.3 (15.7 - 21.3) | 17.9 (15.5 - 20.9) | 18.7 (16.1 - 21.8) | 18.7 (16.2 - 21.6) |
| 95%                     | 21.5 (17.7 - 25.9) | 23.1 (19.3 - 27.5) | 22.4 (18.9 - 26.6) | 23.9 (20.2 - 28.6) | 23.9 (20.3 - 28.3) |
| 97,5%                   | 26.2 (21.2 - 32.5) | 28.1 (23.0 - 34.3) | 27.3 (22.5 - 33.1) | 29.6 (24.4 - 36)   | 29.5 (24.2 - 35.4) |
| 99%                     | 32.9 (25.9 - 41.9) | 35.5 (28.3 - 44.4) | 34.3 (27.5 - 42.6) | 37.9 (30.2 - 47.2) | 37.7 (30.2 - 46.3) |

**Table S7: Weibull**

| Quantile/length in days | 4 (n=104)          | 5 (n=122)          | 6 (n=130)          | 8 (n=146)          | 10 (n=160)         |
|-------------------------|--------------------|--------------------|--------------------|--------------------|--------------------|
| 2,5%                    | 1.4 (0.9 - 1.9)    | 1.5 (1.0 - 2.0)    | 1.5 (1 - 2)        | 1.3 (0.9 - 1.8)    | 1.3 (0.9 - 1.8)    |
| 5%                      | 2.1 (1.5 - 2.7)    | 2.1 (1.6 - 2.8)    | 2.1 (1.6 - 2.7)    | 2 (1.5 - 2.5)      | 2 (1.5 - 2.5)      |
| 10%                     | 3.1 (2.3 - 3.8)    | 3.2 (2.4 - 3.9)    | 3.2 (2.5 - 3.9)    | 3 (2.3 - 3.7)      | 3 (2.4 - 3.7)      |
| 25%                     | 5.3 (4.4 - 6.2)    | 5.5 (4.7 - 6.5)    | 5.5 (4.6 - 6.4)    | 5.3 (4.5 - 6.2)    | 5.3 (4.6 - 6.2)    |
| 50%                     | 8.5 (7.4 - 9.5)    | 9.0 (7.9 - 10.0)   | 8.9 (7.9 - 9.9)    | 8.8 (7.8 - 9.8)    | 8.8 (7.9 - 9.8)    |
| 75%                     | 12.3 (11.1 - 13.7) | 13.1 (11.9 - 14.5) | 13 (11.8 - 14.3)   | 13 (11.8 - 14.3)   | 13.1 (12 - 14.4)   |
| 90%                     | 16.2 (14.5 - 18.1) | 17.4 (15.6 - 19.3) | 17.1 (15.5 - 18.9) | 17.4 (15.8 - 19.3) | 17.5 (15.9 - 19.3) |
| 95%                     | 18.7 (16.7 - 21.2) | 20.1 (18.0 - 22.5) | 19.7 (17.7 - 22.1) | 20.2 (18.1 - 22.5) | 20.3 (18.4 - 22.6) |
| 97,5%                   | 20.9 (18.5 - 23.9) | 22.5 (19.9 - 25.4) | 22.1 (19.7 - 24.9) | 22.8 (20.3 - 25.6) | 22.9 (20.5 - 25.7) |
| 99%                     | 23.6 (20.5 - 27.2) | 25.4 (22.2 - 29.0) | 25 (22 - 28.4)     | 25.9 (22.9 - 29.4) | 26 (23.1 - 29.4)   |

**Table S8: Gamma**

| <b>Quantile/length in days</b> | <b>4 (n=104)</b>   | <b>5 (n=122)</b>   | <b>6 (n=130)</b>   | <b>8 (n=146)</b>   | <b>10 (n=160)</b>  |
|--------------------------------|--------------------|--------------------|--------------------|--------------------|--------------------|
| <b>2,5%</b>                    | 1.9 (1.3 - 2.4)    | 1.9 (1.3 - 2.5)    | 1.9 (1.4 - 2.5)    | 1.7 (1.2 - 2.2)    | 1.7 (1.3 - 2.2)    |
| <b>5%</b>                      | 2.5 (1.8 - 3.1)    | 2.5 (1.9 - 3.2)    | 2.6 (2 - 3.2)      | 2.3 (1.7 - 2.9)    | 2.3 (1.8 - 2.9)    |
| <b>10%</b>                     | 3.3 (2.6 - 4)      | 3.5 (2.8 - 4.2)    | 3.5 (2.8 - 4.2)    | 3.2 (2.6 - 3.9)    | 3.2 (2.6 - 3.9)    |
| <b>25%</b>                     | 5.2 (4.4 - 6)      | 5.5 (4.7 - 6.3)    | 5.5 (4.7 - 6.3)    | 5.2 (4.5 - 6)      | 5.3 (4.6 - 6)      |
| <b>50%</b>                     | 8.1 (7.2 - 9.1)    | 8.6 (7.7 - 9.6)    | 8.5 (7.6 - 9.4)    | 8.4 (7.5 - 9.3)    | 8.4 (7.6 - 9.3)    |
| <b>75%</b>                     | 11.9 (10.6 - 13.4) | 12.7 (11.4 - 14.1) | 12.5 (11.3 - 13.9) | 12.6 (11.4 - 14)   | 12.7 (11.5 - 14)   |
| <b>90%</b>                     | 16.2 (14.3 - 18.5) | 17.4 (15.4 - 19.5) | 17 (15.2 - 19.1)   | 17.5 (15.7 - 19.6) | 17.6 (15.7 - 19.6) |
| <b>95%</b>                     | 19.2 (16.8 - 22)   | 20.6 (18.2 - 23.4) | 20.2 (17.8 - 22.8) | 20.9 (18.5 - 23.6) | 21 (18.7 - 23.6)   |
| <b>97,5%</b>                   | 22.1 (19 - 25.4)   | 23.7 (20.7 - 27.1) | 23.2 (20.3 - 26.4) | 24.1 (21.2 - 27.5) | 24.2 (21.4 - 27.4) |
| <b>99%</b>                     | 25.7 (22 - 30)     | 27.6 (23.9 - 31.9) | 27 (23.4 - 31)     | 28.3 (24.6 - 32.5) | 28.4 (24.9 - 32.5) |
